# Supplementary material for: Antimicrobial Resistance of Sterile Site Infections in Sub-Saharan Africa: A Systematic Review
Source: PubMed Central journal article supplement — Open Forum Infect Dis. 2017 Oct 6;4(4):ofx209. doi: 10.1093/ofid/ofx209 (PMC5714239; doi:10.1093/ofid/ofx209), 2017-10-06
Supplement: ofx209_suppl_supplemental_data.pdf [file ofx209_suppl_supplemental_data.pdf]

1 Supplementary Table 1. Summary of studies of AMR in bloodstream infections, UTIs, meningitis in SSA, 2013-2016

| Author                          | Location; Study dates | Age range (population type)           | Clinical Inclusion Criteria                           | Clinical Syndrome | Total Number of Samples | Prevalence of positive cx, N, %     | Mortality Rate | ESBL Testing, Method, Organisms                                                                             | Common Isolates                                                                                                                                                                                                                                |
|---------------------------------|-----------------------|---------------------------------------|-------------------------------------------------------|-------------------|-------------------------|-------------------------------------|----------------|-------------------------------------------------------------------------------------------------------------|------------------------------------------------------------------------------------------------------------------------------------------------------------------------------------------------------------------------------------------------|
| Acquah et al. <sup>2</sup>      | Ghana; 2011-2012      | Children; 0-14 yrs.                   | Sepsis not otherwise specified                        | Bacteremia        | 331                     | 86/26%                              | NR             | NR                                                                                                          | <i>E. coli</i> 6.9%<br><i>K. pneumoniae</i> 6.9%<br><i>Klebsiella spp.</i> 6.9%<br><i>P. aeruginosa</i> 3.5%<br><i>S. pneumoniae</i> 1.2%<br><i>S. typhi</i> 6.9%<br>NTS 2.3%<br><i>S. aureus</i> 32%<br>CoNS 29%<br>Beta Hemolytic Strep 1.2% |
| Christopher et al. <sup>5</sup> | Tanzania; 2011-2012   | Children; 2-60 months.                | Fever                                                 | Bacteremia        | 317                     | 21/6.6%                             | 2.8%           | Y, 25%, double-disk diffusion method<br><br><i>E.coli</i><br><i>K.pneumoniae</i><br><i>Citrobacter spp.</i> | <i>E. coli</i> 33%<br><i>K. pneumoniae</i> 28.6%<br><i>Pseudomonas spp.</i> 9.5%<br><i>Salmonella spp.</i> 4.25%<br><i>Enterobacter spp.</i> 4.25%                                                                                             |
| Endris et al. <sup>7</sup>      | Ethiopia; 2012        | Children and adults                   | Fever; Parasitologically confirmed VL; SIRS           | Bacteremia        | 83                      | 16/19.3%                            | NR             | NR                                                                                                          | <i>E. coli</i> 6.3%<br><i>Klebsiella spp.</i> 12.5%<br>MSSA 56.2%<br>MRSA 12.5%<br><i>S. pneumoniae</i> 6.3%                                                                                                                                   |
| Isendahl et al. <sup>12</sup>   | Guinea-Bissau; 2010   | Children; specific ages not specified | Fever, tachycardia                                    | Bacteremia        | 372                     | 46/12%                              | NR             | Y, 4.3%, Check-MDR Multiplex PCR (Check-Points)<br><br><i>K.pneumoniae</i>                                  | <i>S. aureus</i> 56%<br><i>S. pneumoniae</i> 8.7%<br><i>E. coli</i> 4.3%<br><i>S. typhi</i> 6.5%<br>NTS 10.9%<br><i>K. pneumoniae</i> 6.5%<br><i>Enterococcus spp</i> 4.3%                                                                     |
| Labi et al. <sup>13</sup>       | Ghana; 2010-2013      | NR                                    | Clinical inclusion criteria not specified             | Bacteremia        | 23708                   | 181/6.5% ( <i>Salmonella</i> only). | NR             | NR                                                                                                          | <i>S. typhi</i> 36.5%<br>NTS 63.5%                                                                                                                                                                                                             |
| Lunguya et al. <sup>4</sup>     | DRC; 2007-2011        | 0-70 yrs.                             | Clinical suspicion of bacteremia caused by a local or | Bacteremia        | 9634                    | 989/10.3%                           | NR             | Y, *3.9%, 1.3%, Vitek 2 (bioMérieux), confirmation by double-disk diffusion method                          | NTS 23.6%<br><i>S. typhi</i> 20.3%<br>* <i>Salmonella spp.</i> only reported                                                                                                                                                                   |

|                               |                             |                               |                                                                           |            |       |            |                                                                                             |                                                                                                                                    |                                                                                                                                                                                                             |
|-------------------------------|-----------------------------|-------------------------------|---------------------------------------------------------------------------|------------|-------|------------|---------------------------------------------------------------------------------------------|------------------------------------------------------------------------------------------------------------------------------------|-------------------------------------------------------------------------------------------------------------------------------------------------------------------------------------------------------------|
|                               |                             |                               | systemic infection                                                        |            |       |            |                                                                                             | <i>Salmonella typhimurium</i><br><i>Salmonella</i> spp.                                                                            |                                                                                                                                                                                                             |
| Mahende et al. <sup>16</sup>  | Tanzania; 2013              | Children; 2-59 months         | Fever                                                                     | Bacteremia | 808   | 26/3.2%    | NR                                                                                          | NR                                                                                                                                 | <i>E. coli</i> 3.8%<br><i>S. typhi</i> 65.4%<br><i>S. pneumoniae</i> 15.4%<br>NTS 7.7%<br><i>S. aureus</i> 3.8%<br><i>Enterobacter cloacae</i> 3.8%                                                         |
| Moon et al. <sup>5</sup>      | Mozambique; 2012            | NR                            | Fever                                                                     | Bacteremia | 258   | 39/15.1%   | 2.6%                                                                                        | NR                                                                                                                                 | <i>E. coli</i> 5.1%<br><i>Salmonella</i> spp. 79.5%<br>- <i>S. typhi</i> 5.1%<br>- NTS 71%<br><i>S. pneumoniae</i> 10%                                                                                      |
| Musiime et al. <sup>1</sup>   | Uganda, Zimbabwe; 2007-2011 | Children; 3 months to 17 yrs. | Fever                                                                     | Bacteremia | 848   | 123/14.5%  | 7%                                                                                          | Y, 60%, Phoenix (Becton-Dickinson)<br><i>K.pneumoniae</i>                                                                          | <i>E. coli</i> 4%<br><i>K. pneumoniae</i> 5%<br><i>S. aureus</i> 9%<br><i>S. pneumoniae</i> 28%<br><i>Salmonella</i> spp. 5%                                                                                |
| Obaro et al. <sup>18</sup>    | Nigeria; 2008-2015          | Children; 0-60 months         | Fever, altered mental status, dehydration, diarrhea, convulsions/seizures | Bacteremia | 10133 | 1066/10.5% | 1.3 % overall mortality. 3.2% for <i>Salmonella typhi</i> .                                 | NR                                                                                                                                 | <i>S. typhi</i> 31.8%<br>NTS 8.7%                                                                                                                                                                           |
| Preziosi et al. <sup>17</sup> | Mozambique; 2011-2014       | Greater than 18 yrs.          | Fever, admission in past 24h, no previous antibiotics                     | Bacteremia | 841   | 63/7.5%    | 18% mortality in patients with documented outcome, of these 23.2% mortality with bacteremia | Y, 13.6%, double-disk diffusion method<br><i>S.typhimurium</i><br><i>Enterobacter</i> spp.<br><i>K.pneumoniae</i><br><i>E.coli</i> | <i>E. coli</i> 24%<br><i>K. pneumoniae</i> 6.8%<br><i>S. aureus</i> 28.5%<br>- MSSA 13.5%<br>- MRSA 15%<br>NTS 17%<br><i>S. pneumoniae</i> 5%<br><i>P. aeruginosa</i> 1.7%<br><i>Enterococcus</i> spp. 3.4% |

|                                |                     |                                 |                                           |            |      |            |    |                                                                                                                                                                                             |                                                                                                                                                                                                                       |
|--------------------------------|---------------------|---------------------------------|-------------------------------------------|------------|------|------------|----|---------------------------------------------------------------------------------------------------------------------------------------------------------------------------------------------|-----------------------------------------------------------------------------------------------------------------------------------------------------------------------------------------------------------------------|
| Wasihun et al. <sup>15</sup>   | Ethiopia; 2014      | 1-81 yrs.                       | Fever                                     | Bacteremia | 502  | 115/23%    | NR | NR                                                                                                                                                                                          | <i>S. aureus</i> 35.7%<br><i>E. coli</i> 10.4%<br><i>S. typhi</i> 6.9%<br><i>Klebsiella spp.</i> 2.6%                                                                                                                 |
| Abejew et al. <sup>10</sup>    | Ethiopia; 2002-2011 | All ages                        | Sepsis not otherwise specified            | UTI        | 2486 | 680/27.35% | NR | NR                                                                                                                                                                                          | <i>E. coli</i> 60.3%<br><i>Pseudomonas spp.</i> 8.7%<br><i>S. aureus</i> 7.4%<br><i>Klebsiella spp.</i> 9%                                                                                                            |
| Akingbade et al. <sup>14</sup> | Nigeria; NR         | NR                              | UTI Sx. (dysuria, freq., urgency)         | UTI        | 120  | NR         | NR | NR                                                                                                                                                                                          | Only <i>E. coli</i> isolates included                                                                                                                                                                                 |
| Irengue et al. <sup>8</sup>    | DRC; 2012-2013      | 0-75 yrs.                       | UTI symptoms                              | UTI        | 2724 | 643/23.6%  | NR | Y, 15%, double-disk diffusion method<br><i>E. coli</i><br><i>Enterobacter spp.</i><br><i>Klebsiella spp.</i><br><i>Citrobacter spp.</i><br><i>Proteus spp.</i><br><i>Acinetobacter spp.</i> | <i>E. coli</i> 58.5%<br><i>Klebsiella spp.</i> 21.9%<br><i>Enterobacter spp.</i> 16.2%                                                                                                                                |
| Kibret al al. <sup>9</sup>     | Ethiopia; 2003-2010 | 1-85 yrs.                       | Clinical inclusion criteria not specified | UTI        | 1404 | 319/22.7%  | NR | NR                                                                                                                                                                                          | <i>E. coli</i> 63.6%<br><i>Klebsiella spp.</i> 8.5%<br><i>Proteus spp.</i> 8.2%<br><i>Pseudomonas spp.</i> 6.9%<br><i>S. aureus</i> 3.8%<br><i>Enterobacter spp.</i> 2.2%                                             |
| Ochada et al. <sup>19</sup>    | Nigeria; NR         | 0-50+ yrs.                      | Clinical inclusion criteria not specified | UTI        | 300  | 88/29.3%   | NR | NR                                                                                                                                                                                          | <i>E. coli</i> 21.6%<br><i>K. pneumoniae</i> 15.9%<br><i>P. aeruginosa</i> 10.2%<br><i>S. aureus</i> 13.6%                                                                                                            |
| Renuart et al. <sup>3</sup>    | Botswana; 2007-2010 | Not fully specified; 0-100 yrs. | Clinical inclusion criteria not specified | UTI        | 1440 | 744/51.7%  | NR | Y, 11%, Microscan WalkAway (Siemens Healthcare Diagnostics)<br><i>E. coli</i><br><i>Proteus spp.</i><br><i>Klebsiella spp.</i>                                                              | <i>E. coli</i> 63%<br><i>Klebsiella spp.</i> 14%, 7%<br><i>S. aureus</i> 2%, 1%<br><i>Pseudomonas spp.</i> 1%, 3%<br><i>Enterobacter spp.</i> 2%, 2%<br><i>Enterococcus spp.</i> 2%, 4%<br><i>Salmonella spp.</i> <1% |

|                               |                  |                              |                                                                                                                                  |            |     |          |    |    |                                                                                                                                      |
|-------------------------------|------------------|------------------------------|----------------------------------------------------------------------------------------------------------------------------------|------------|-----|----------|----|----|--------------------------------------------------------------------------------------------------------------------------------------|
| Ochieng' et al. <sup>11</sup> | Kenya; 2010-2012 | Children; 1 month to 20 yrs. | Fever, headache, nuchal rigidity, lethargy, dehydration, GI symptoms, bulging fontanelle, signs of local infection at shunt site | Meningitis | 127 | 53/41.7% | 4% | NR | <i>S. aureus</i> 24.5%<br>- MSSA 15.1%<br>- MRSA 9.4%<br>Other Staph species 26%<br>GNB 40%<br>Streptococci 6%<br>Mixed infection 4% |
|-------------------------------|------------------|------------------------------|----------------------------------------------------------------------------------------------------------------------------------|------------|-----|----------|----|----|--------------------------------------------------------------------------------------------------------------------------------------|

2  
3  
4

\*NS=not specified. NR=not reported. Y=yes. † Two different ESBL testing methods used: 3.9% by VITEK2 and 1.3% by double-disk diffusion.

5 *Supplementary Table 2. Microbiologic analysis and methods of selected studies*

| Author                          | Method of Sample Incubation | Method of Organism Identification | CLSI criteria used (Y/N) | Method of antimicrobial susceptibility testing | Possible contaminants identified (Y/N) | Identified Contaminants N,% |
|---------------------------------|-----------------------------|-----------------------------------|--------------------------|------------------------------------------------|----------------------------------------|-----------------------------|
| Abejew et al. <sup>10</sup>     | Manual incubation           | Biochemical analysis              | Y                        | Kirby-bauer disk diffusion                     | NS                                     | NR                          |
| Acquah et al. <sup>2</sup>      | Bactec                      | Biochemical analysis              | Y                        | Kirby-bauer disk diffusion                     | Y                                      | 10, 3%                      |
| Akingbade et al. <sup>14</sup>  | Manual incubation           | Biochemical analysis              | Y                        | Kirby-bauer disk diffusion                     | Y                                      | NR                          |
| Christopher et al. <sup>5</sup> | Manual incubation           | Biochemical analysis              | Y                        | Kirby-bauer disk diffusion                     | Y                                      | 10, 3.2%                    |
| Endris et al. <sup>7</sup>      | Manual incubation           | Biochemical analysis              | Y                        | Kirby-bauer disk diffusion                     | Y                                      | 4, 4.8%                     |
| Irengbe et al. <sup>8</sup>     | Manual incubation           | Biochemical analysis              | N                        | Kirby-bauer disk diffusion; E-test             | Y                                      | NR                          |

|                               |                   |                                                                              |   |                                            |    |          |
|-------------------------------|-------------------|------------------------------------------------------------------------------|---|--------------------------------------------|----|----------|
| Isendahl et al. <sup>12</sup> | Manual incubation | VITEK2                                                                       | N | Kirby-bauer disk diffusion; E-test; VITEK2 | Y  | 117/31%  |
| Kibret al al. <sup>9</sup>    | Manual incubation | Biochemical analysis                                                         | Y | Kirby-bauer disk diffusion                 | NS | NR       |
| Labi et al. <sup>13</sup>     | Bactec            | Biochemical analysis; BBL Crystal Enteric/Nonfermenter identification system | Y | Kirby-bauer disk diffusion                 | N  | NR       |
| Lunguya et al. <sup>4</sup>   | Manual incubation | Biochemical analysis; VITEK2                                                 | Y | E-test; VITEK2                             | N  | NR       |
| Mahende et al. <sup>16</sup>  | Bactec            | Biochemical analysis                                                         | Y | Kirby-bauer disk diffusion                 | Y  | 36/58.1% |
| Moon et al. <sup>6</sup>      | Bactec            | Biochemical analysis                                                         | Y | Kirby-bauer disk diffusion; E-test         | N  | NR       |
| Musiime et al. <sup>1</sup>   | Bactec            | Phoenix                                                                      | Y | Kirby-bauer disk diffusion; Phoenix        | Y  | 52,41%   |

|                               |                   |                               |    |                                    |    |                                                                                                |
|-------------------------------|-------------------|-------------------------------|----|------------------------------------|----|------------------------------------------------------------------------------------------------|
| Obaro et al. <sup>18</sup>    | Bactec            | Biochemical analysis; API 20E | Y  | Kirby-bauer disk diffusion         | NS | NR                                                                                             |
| Ochada et al. <sup>19</sup>   | Manual incubation | Biochemical analysis          | Y  | Kirby-bauer disk diffusion         | N  | NR                                                                                             |
| Ochieng' et al. <sup>11</sup> | Other             | Not specified                 | NS | NS                                 | N  | NR                                                                                             |
| Preziosi et al. <sup>17</sup> | Bactec            | Biochemical analysis          | Y  | Kirby-bauer disk diffusion; VITEK2 | Y  | CoNS and diphtheroids discarded prior to analysis; 50, 5.9% considered contaminants after this |
| Renuart et al. <sup>3</sup>   | Bactec            | Biochemical analysis          | Y  | Kirby-bauer disk diffusion         | N  | NR                                                                                             |
| Wasihun et al. <sup>15</sup>  | Manual incubation | Biochemical analysis          | Y  | Kirby-bauer disk diffusion         | N  | NR                                                                                             |

*\*NS=not specified.  
NR=not reported.*

41  
42  
43

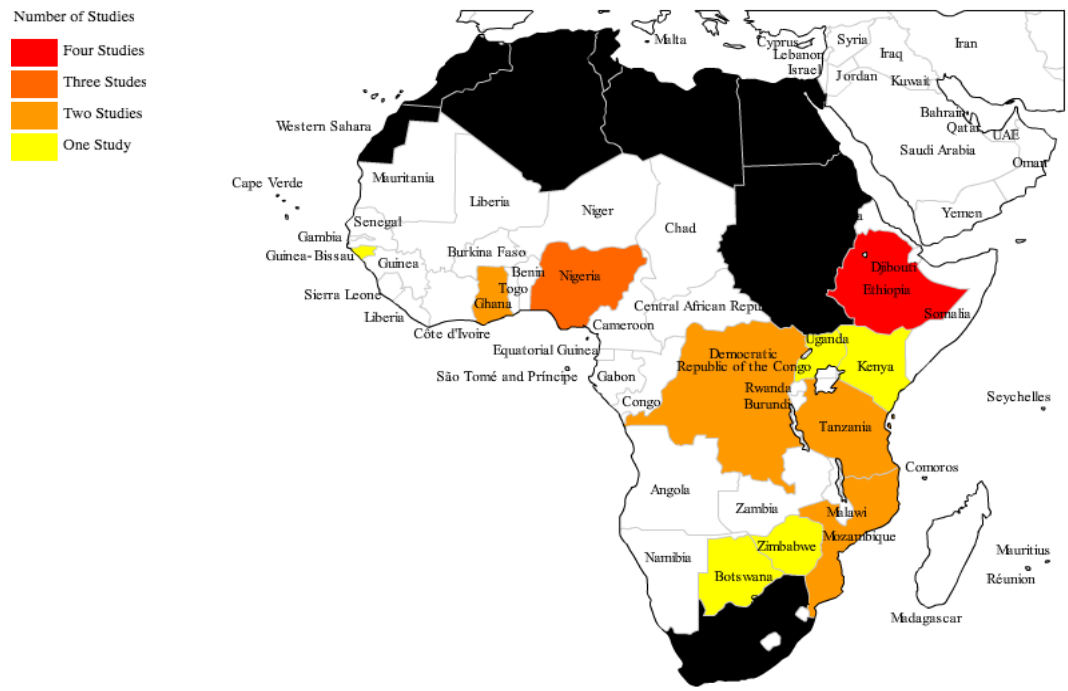

44  
45 *Supplementary Figure 1. Study locations by country and number of studies per country. \*Black fill denotes countries not included*  
46 *in this review. Only sub-Saharan African countries included with the exception of South Africa.*

47  
48  
49  
50  
51  
52  
53  
54  
55



56

57

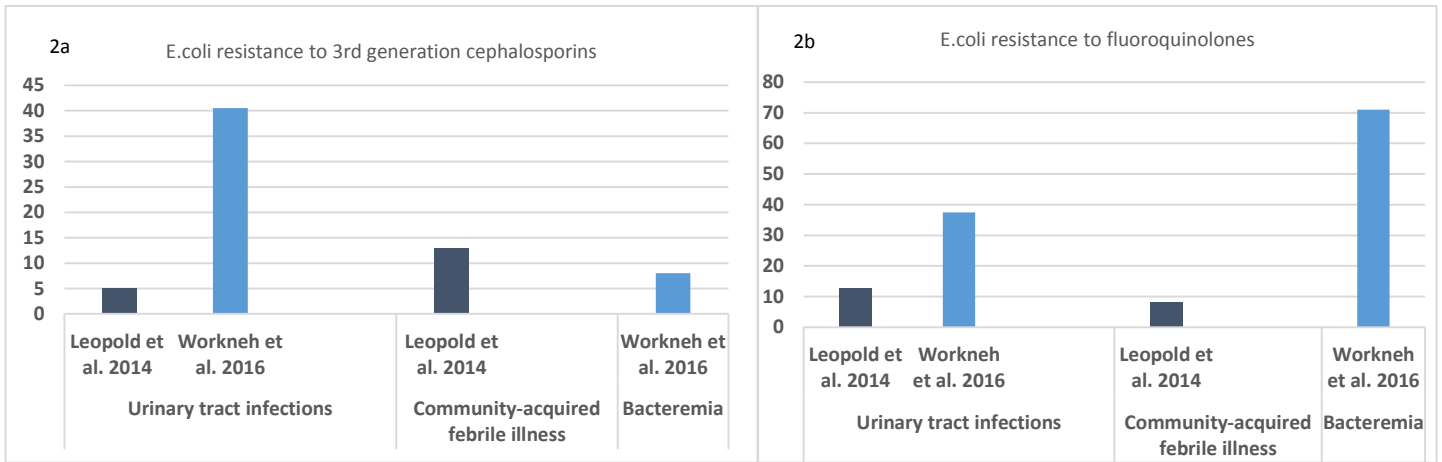

58

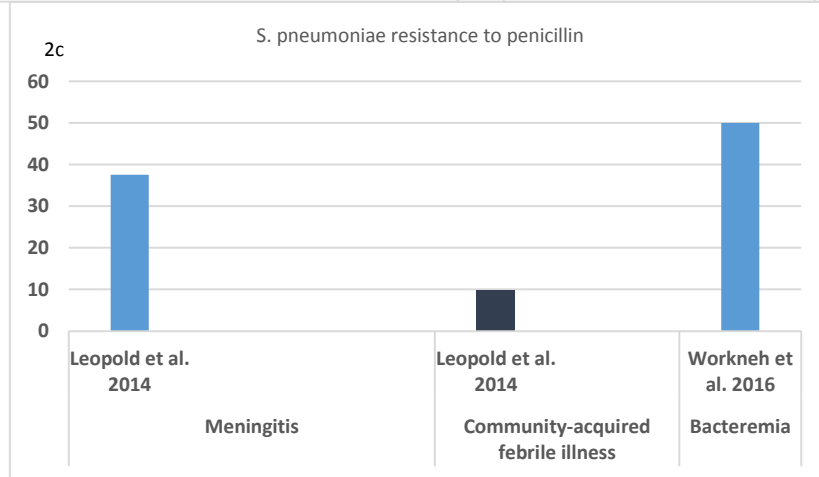

Supplementary Figure 2a. *E. coli* resistance to 3rd generation cephalosporins. 2b. *E. coli* resistance to fluoroquinolones. 2c. *S. pneumoniae* resistance to penicillin.

59

## 60 Search Terms

61 PubMed was searched with the terms "Drug Resistance, Bacterial"[Mesh] OR "antimicrobial  
62 drug resistance"[tiab] AND "Microbial Sensitivity Tests"[Mesh] OR "Anti-Bacterial  
63 Agents/therapeutic use"[Mesh] OR "antimicrobial susceptibility"[tiab] AND "Africa South of the  
64 Sahara"[Mesh] OR "sub-Saharan Africa"[tiab] NOT ("South Africa"[Mesh] OR "South  
65 Africa"[tiab])). Filters were publication date from 02/01/2013 to 22/03/2016 and human

66 studies. Embase was searched with the terms 'antibiotic resistance'/exp OR 'antimicrobial drug  
67 resistance':ab,ti AND 'antiinfective agent'/exp/dd\_dt OR 'microbial sensitivity test'/exp OR  
68 'antimicrobial susceptibility':ab,ti AND 'africa south of the sahara'/exp OR 'sub-saharan  
69 africa':ab,ti NOT ('south africa'/exp OR 'south africa':ab,ti). Filters were 2013 to 2016 and  
70 humans. We also searched African Journals Online (AJO) with the terms “antimicrobial drug  
71 resistance” AND “antimicrobial susceptibility” AND “sub-Saharan Africa.” Cochrane Library was  
72 searched with the same search string as AJO.

73

#### 74 Exclusion Criteria

75 Of the 120 full text articles screened, 96 articles in total were excluded. 46 included samples  
76 obtained from non-sterile sites<sup>20-65</sup>, 29 were not associated with a disease process<sup>66-94</sup>, 6 were  
77 studies on gonorrhoea or other STDs<sup>95-100</sup>, 3 were pooled data or meta-analysis<sup>101-103</sup>, 2 were  
78 case reports, reviews or commentaries<sup>104-105</sup>, 1 did not report sufficient susceptibility data<sup>106</sup>, 1  
79 did not test enough unique isolates<sup>107</sup>, 1 was a poster presentation or abstract<sup>108</sup>, 1 was in the  
80 wrong country (outside sub-Saharan Africa)<sup>109</sup>, 1 included pathogens that were inconsistent  
81 with the clinical scenario<sup>110</sup>, 2 were studies of environmental samples<sup>111-112</sup>, 2 were duplicate  
82 studies not screened out previously and 1 full text was not able to be retrieved. 24 studies were  
83 included for data extraction and an additional 5 studies were excluded during data extraction; 1  
84 was a letter to the editor that did not describe methods or report susceptibilities<sup>113</sup>, 1 included  
85 samples from non-sterile sites<sup>114</sup>, 1 did not report complete antimicrobial susceptibilities<sup>115</sup>,  
86 and 2 were not associated with a disease process<sup>116-117</sup>.

87

88 **References**

- 89 1 Musiime V, Cook A, Bakeera-Kitaka S et al. Bacteremia, causative agents and  
90 antimicrobial susceptibility among HIV-1-infected children on antiretroviral therapy in Uganda  
91 and Zimbabwe. *Pediatr Infect Dis J* 2013; 32: 856-62.
- 92 2 Acquah SE, Quaye L, Sagoe K et al. Susceptibility of bacterial etiological agents to  
93 commonly-used antimicrobial agents in children with sepsis at the Tamale Teaching Hospital.  
94 *BMC Infect Dis* 2013; 13: 89.
- 95 3 Renuart, AJ, Goldfarb, DM, Mokomane, M et al. Microbiology of Urinary Tract Infections  
96 in Gaborone, Botswana. *PLoS One* 2013; 8: e57776.
- 97 4 Lunguya O, Lejon V, Phoba MF et al. Antimicrobial resistance in invasive non-typhoid  
98 Salmonella from the Democratic Republic of the Congo: emergence of decreased  
99 fluoroquinolone susceptibility and extended-spectrum beta lactamases. *PLoS Negl Trop Dis*  
100 2013; 7: e2103.
- 101 5 Christopher A, Mshana SE, Kidenya BR et al. Bacteremia and resistant gram-negative  
102 pathogens among under-fives in Tanzania. *Ital J Pediatr* 2013; 39: 27.
- 103 6 Moon TD, Silva WP, Buene M et al. Bacteremia as a cause of fever in ambulatory, HIV-  
104 infected Mozambican adults: Results and policy implications from a prospective observational  
105 study. *PLoS One* 2013; 8: e83591.
- 106 7 Endris M, Takele Y, Woldeyohannes D et al. Bacterial sepsis in patients with visceral  
107 leishmaniasis in Northwest Ethiopia. *BioMed Res Int* 2014; 2014: 361058.

108 8 Ireng LM, Kabego L, Vandenberg O et al. Antimicrobial resistance in urinary isolates  
109 from inpatients and outpatients at a tertiary care hospital in South-Kivu Province (Democratic  
110 Republic of Congo). *BMC Res Notes* 2014; 7: 374.

111 9 Kibret M, Abera B. Prevalence and antibiogram of bacterial isolates from urinary tract  
112 infections at Dessie Health Research Laboratory, Ethiopia. *Asian Pac J Trop Biomed* 2014; 4:  
113 164-168.

114 10 Abejew AA, Denboba AA, Mekonnen AG. Prevalence and antibiotic resistance pattern of  
115 urinary tract bacterial infections in Dessie area, North-East Ethiopia. *BMC Res Notes* 2014; 7:  
116 687.

117 11 Ochieng' N, Okechi H, Ferson S et al. Bacteria causing ventriculoperitoneal shunt  
118 infections in a Kenyan population. *J Neurosurg Pediatr* 2015; 15: 150-5.

119 12 Isendahl J, Manjuba C, Rodrigues A et al. Prevalence of community-acquired  
120 bacteraemia in Guinea-Bissau: an observational study. *BMC Infect Dis* 2014; 14: 3859.

121 13 Labi AK, Obeng-Nkrumah N, Addison NO et al. *Salmonella* blood stream infections in a  
122 tertiary care setting in Ghana. *BMC Infect Dis* 2014; 14: 3857.

123 14 Akingbade O, Balogun S, Ojo D et al. Resistant plasmid profile analysis of multidrug  
124 resistant *Escherichia coli* isolated from urinary tract infections in Abeokuta, Nigeria. *Afr Health*  
125 *Sci* 2014; 14: 821-8.

126 15 wasihun, AG, Wlekidan LN, Gebremariam SA et al. Diagnosis and Treatment of Typhoid  
127 Fever and Associated Prevailing Drug Resistance in Northern Ethiopia. *Int J Infect Dis* 2015; 35:  
128 e96-e102.

129 16 Mahende C, Ngasala B, Lusingu J et al. Bloodstream bacterial infection among  
130 outpatient children with acute febrile illness in north-eastern Tanzania. *BMC Res Notes* 2015;  
131 8: 289.

132 17 Preziosi M, Zimba TF, Lee, K et al. A prospective observational study of bacteraemia in  
133 adults admitted to an urban Mozambican hospital. *S Afr Med J* 2015; 105: 370-374.

134 18 Obaro SK, Hassan-Hanga F, Olateju EK et al. *Salmonella* bacteremia among children in  
135 central and Northwest Nigeria, 2008-2015. *Clin Infect Dis* 2015; 61: S325-S331.

136 19 Ochada NS, Nasiru IA, Thairu Y et al. Antimicrobial susceptibility pattern of urinary  
137 pathogens isolated from two tertiary hospitals in Southwestern Nigeria. *Afr J Clin Exp Micro*  
138 2015; 16: 12-22.

139 20 Abamecha A, Wondafrash B, Abdissa A. Antimicrobial resistance profile of *Enterococcus*  
140 species isolated from intestinal tracts of hospitalized patients in Jimma, Ethiopia. *BMC Res*  
141 *Notes* 2015; 8: 213. 2015

142 21 Abera B, Kibret M. Azithromycin, fluoroquinolone and chloramphenicol resistance of  
143 non-chlamydia conjunctival bacteria in rural community of Ethiopia. *Indian J Ophthalmol* 2014;  
144 62: 236-9.

145 22 Adugna A, Kibret M, Abera B et al. Antibiogram of *E. coli* serotypes isolated from  
146 children aged under five with acute diarrhea in Bahir Dar town. *Afr Health Sci* 2015; 15: 656-64.

147 23 Akinkunmi EO, Adesunkanmi AR, Lamikanra A. Pattern of pathogens from surgical  
148 wound infections in a Nigerian hospital and their antimicrobial susceptibility profiles. *Afr*  
149 *Health Sci* 2014; 14: 802-9.

150 24 Ako-Nai AK, Abumbere G, Akinyoola AL et al. Characterisation of bacterial isolates from  
151 patient wounds and environmental factors predictive of post-surgical infections at the  
152 orthopedic ward in Ile-Ife, Nigeria. *E Afr Med J* 2013; 90: 380-6.

153 25 Alabi AS, Frielinghaus L, Kaba H et al. Retrospective analysis of antimicrobial resistance  
154 and bacterial spectrum of infection in Gabon, Central Africa. *BMC Infect Dis* 2013; 13: 455.

155 26 Anagaw B, Gezachew M, Biadgelgene F et al. Antimicrobial susceptibility patterns of  
156 *Streptococcus pneumoniae* over 6 years at Gondar University Hospital, Northwest Ethiopia.  
157 *Asian Pac J Trop Biomed* 2013; 3: 536-541.

158 27 Anago E, Ayi-Fanou L, Akpovi CD et al. Antibiotic resistance and genotype of beta-  
159 lactamase producing *Escherichia coli* in nosocomial infections in Cotonou, Benin. *Ann Clin*  
160 *Microbiol Antimicrob* 2015; 14: 5.

161 28 Assefa Y, Moges F, Endris M et al. Bacteriological profile and drug susceptibility patterns  
162 in dacryocystitis patients attending Gondar University Teaching Hospital, Northwest Ethiopia.  
163 *BMC Ophthalmol* 2015; 15: 34.

164 29 Bisi-Johnson MA, Olowe OA. Studies on bacterial agents of surgical site infection in  
165 Osogbo, South Western Nigeria. *Int J Infect Dis* 2014; 21: 346.

166 30 Bos JC, Beishuizen SJ, Madeira GC et al. Antimicrobial susceptibility of *Streptococcus*  
167 *pneumoniae* in adult patients with pneumococcal pneumonia in an urban hospital in  
168 Mozambique. *BMC Res Notes* 2014; 7: 110.

169 31 Chukwu Emelda E, Nwaokorie Francisca O, Umeizudike Kehinde A et al. Susceptibility  
170 pattern of *Prevotella* and *Porphyromonas* species from patients with odontogenic infections in  
171 Lagos University Teaching Hospital to amoxicillin. *Int J Pharm Bio Sci* 2013; 4: B760-B765.

172 32 Coles CL, Mabula K, Seidman JC et al. Mass distribution of azithromycin for trachoma  
173 control is associated with increased risk of azithromycin-resistant *Streptococcus pneumoniae*  
174 carriage in young children 6 months after treatment. *Clin Infect Dis* 2013; 56: 1519-26.

175 33 Eguale T, Gebreyes WA, Asrat D et al. Non-typhoidal *Salmonella* serotypes, antimicrobial  
176 resistance and co-infection with parasites among patients with diarrhea and other  
177 gastrointestinal complaints in Addis Ababa, Ethiopia. *BMC Infect Dis* 2015; 15: 497.

178 34 Eguale T, Gebreyes W, Asrat D et al. Non-typhoidal salmonellosis, antimicrobial  
179 resistance and co-infection with parasites among patients with diarrhea and gastroenteritis in  
180 Addis Ababa, Ethiopia. *Trop Med Int Health* 2015; 20: 271.

181 35 Fadeyibi IO, Raji MA, Ibrahim NA et al. Chronic ulcers in Ikeja-Lagos, Nigeria: an  
182 eighteen-month review of infecting bacterial agents and susceptibility pattern. *Nig Q J Hosp*  
183 *Med* 2013; 23: 145-8

184 36 Godebo G, Kibru G, Tassew H. Multidrug-resistant bacterial isolates in infected wounds  
185 at Jimma University Specialized Hospital, Ethiopia. *Ann Clin Microbiol Antimicrob* 2013; 12: 17.

186 37 Iliyasu G, Habib AG, Aminu MB. Antimicrobial susceptibility pattern of invasive  
187 pneumococcal isolates in North West Nigeria. *J Glob Infect Dis* 2015; 7: 70-74.

188 38 Iyamba JM, Wambale JM, Lukukula CM et al. High prevalence of methicillin resistant  
189 staphylococci strains isolated from surgical site infections in Kinshasa. *Pan Afr Med J* 2014; 18:  
190 322.

191 39 Kihla AJ, Ngunde PJ, Evelyn MS et al. Risk factors for wound infection in health care  
192 facilities in Buea, Cameroon: aerobic bacterial pathogens and antibiogram of isolates. *Pan Afr*  
193 *Med J* 2014; 18: 6.

194 40 Kityamuwesi R, Muwaz L, Kasangaki A et al. Characteristics of pyogenic odontogenic  
195 infection in patients attending Mulago Hospital, Uganda: a cross-sectional study. *BMC Micro*  
196 2015; 15: 46.

197 41 Langendorf C, Le Hello S, Moumouni A et al. Enteric bacterial pathogens in children with  
198 diarrhea in Niger: Diversity and antimicrobial resistance. *PLoS One* 2015; 10: e0120275

199 42 Lengerh A, Moges F, Unakal C et al. Prevalence, associated risk factors and antimicrobial  
200 susceptibility pattern of *Campylobacter* species among under five diarrheic children at Gondar  
201 University Hospital, Northwest Ethiopia. *BMC Pediatr* 2013; 13: 82.

202 43 Mahmud ZH, Islam S, Zaman RU et al. Phenotypic and genotypic characteristics of *Vibrio*  
203 *cholerae* O1 isolated from the Sierra Leone cholera outbreak in 2012. *Trans R Soc Trop Med*  
204 *Hyg* 2014; 108: 715-20.

205 44 Maina EK, Kiiyukia C, Wamae CN et al. Characterization of methicillin-resistant  
206 *Staphylococcus aureus* from skin and soft tissue infections in patients in Nairobi, Kenya. *Int J*  
207 *Infect Dis* 2013; 17: e115-9.

208 45 Mama M, Abdissa A, Sewunet T et al. Antimicrobial susceptibility pattern of bacterial  
209 isolates from wound infection and their sensitivity to alternative topical agents at Jimma  
210 University Specialized Hospital, South-West Ethiopia. *Ann Clin Microbiol Antimicrob* 2014; 13:  
211 14.

212 46 Manyahi J, Matee MI, Majigo M et al. Predominance of multi-drug resistant bacterial  
213 pathogens causing surgical site infections in Muhimbili National Hospital, Tanzania. *BMC Res*  
214 *Notes* 2014; 7: 500.



215 47 Mercy N, Mohamed AA, Zipporah N et al. Phenotypic and genetic characterization of  
216 *Vibrio cholerae* O1 isolated from various regions of Kenya between 2007 and 2010. *Pan Afr*  
217 *Med J* 2014; 19: 8.

218 48 Miwanda B, Moore S, Muyembe JJ et al. Antimicrobial Drug Resistance of *Vibrio*  
219 *cholerae*, Democratic Republic of the Congo. *Emerg Infect Dis* 2015; 21: 847-51.

220 49 Moremi N, Mushi MF, Fidelis M et al. Predominance of multi-resistant gram-negative  
221 bacteria colonizing chronic lower limb ulcers (CLLUs) at Bugando Medical Center. *BMC Res*  
222 *Notes* 2014; 7: 211.

223 50 Mulatu G, Beyene G, Zeynudin A. Prevalence of *Shigella*, *Salmonella* and *Campylobacter*  
224 species and their susceptibility patters among under five children with diarrhea in Hawassa  
225 town, south Ethiopia. *Ethiop J Health Sci* 2014; 24: 101-8.

226 51 Muluye D, Wondimeneh Y, Moges F et al. Types and drug susceptibility patterns of  
227 bacterial isolates from eye discharge samples at Gondar University Hospital, Northwest  
228 Ethiopia. *BMC Res Notes* 2014; 7: 292.

229 52 Nwankwo EO, Mofolorunsho CK, Akande AO. Aetiological agents of surgical site  
230 infection in a specialist hospital in Kano, north-western Nigeria. *Tanzan J Health Res* 2014;  
231 16:289-95.

232 53 Nzouankeu AA, Ngandjio A, Nkanga V et al. Two variants of multidrug resistant *Vibrio*  
233 *Cholerae* O1 Biotype El Tor involved in two consecutives outbreaks of Cholera in Cameroon  
234 (2004-2005 and 2010-2012). *Am J Trop Med Hyg* 2014; 91: 500-501.

235 54 Obeng-Nkrumah N, Twum-Danso K, Krogfelt KA et al. High levels of extended-spectrum  
236 beta-lactamases in a major teaching hospital in Ghana: the need for regular monitoring and  
237 evaluation of antibiotic resistance. *Am J Trop Med Hyg* 2013; 89: 960-4.

238 55 Olowe OA, Aboderin BW, Idris OO et al. Genotypes and phenotypes of Shiga toxin-  
239 producing *Escherichia coli* (STEC) in Abeokuta, Southwestern Nigeria. *Infect Drug Resist* 2014;  
240 7: 253-259.

241 56 Petro D, Mushi MF, Moremi N et al. In vitro susceptibility of multi-drug resistant  
242 *Pseudomonas aeruginosa* and extended-spectrum  $\beta$ -lactamase-producing *Klebsiella*  
243 *pneumoniae* isolated from clinical specimens at Bugando Medical Centre, Tanzania to  
244 Piperacillin-Tazobactam. *Tanzan J Health Res* 2014; 16: 54-7.

245 57 Ramos JM, Pérez-Tanoira R, García-García C et al. Leprosy ulcers in a rural hospital of  
246 Ethiopia: pattern of aerobic bacterial isolates and drug sensitivities. *Ann Clinical Microbiol*  
247 *Antimicrob* 2014; 13: 47.

248 58 Schaumburg F, Alabi AS, Kaba H et al. Molecular characterization of *Shigella spp.* from  
249 patients in Gabon 2011-2013. *Trans R Soc Trop Med Hyg* 2015; 109: 275-9.

250 59 Seni J, Bwanga F, Najjuka CF et al. Molecular characterization of *Staphylococcus aureus*  
251 from patients with surgical site infections at Mulago Hospital in Kampala, Uganda. *PLoS One*  
252 2013; 8: e66153.

253 60 Seni J, Najjuka CF, Kateete, DP et al. Antimicrobial resistance in hospitalized surgical  
254 patients: a silently emerging public health concern in Uganda. *BMC Res Notes* 2013; 6: 298.

255 61 Smith AM, Njanpop-Lafourcade BM, Mengel MA et al. Comparative Characterization of  
256 *Vibrio cholerae* O1 from Five Sub-Saharan African Countries Using Various Phenotypic and  
257 Genotypic Techniques. *PLoS One* 2015; 10: e0142989.

258 62 Tapia MD, Tennant SM, Bornstein K et al. Invasive nontyphoidal *salmonella* infections  
259 among children in Mali, 2002-2014: Microbiological and epidemiologic features guide vaccine  
260 development. *Clin Infect Dis* 2015; 61: S332-S338.

261 63 Udobi CE, Obajuluwa AF, Onaolapo JA. Prevalence and antibiotic resistance pattern of  
262 methicillin-resistant *Staphylococcus aureus* from an orthopaedic hospital in Nigeria. *BioMed*  
263 *Res Int* 2013; 2013: 860467.

264 64 van der Meeren BT, Millard PS, Scacchetti M et al. Emergence of methicillin resistance  
265 and Panton-Valentine leukocidin positivity in hospital- and community-acquired  
266 *Staphylococcus aureus* infections in Beira, Mozambique. *Trop Med Int Health* 2014; 19: 169-76.

267 65 Paglietti B, Falchi, G, Mason, P et al. Diversity among human non-typhoidal salmonellae  
268 isolates from Zimbabwe. *Trans R Soc Trop Med Hyg* 2013; 107: 487-492.

269 66 Ayeni FA, Gbarabon T, Andersen C et al. Comparison of identification and antimicrobial  
270 resistance pattern of *Staphylococcus aureus* isolated from Amassoma, Bayelsa state, Nigeria.  
271 *Afr Health Sci* 2015; 15: 1282-1288.

272 67 Ayepola OO, Olasupo NA, Egwari LO et al. Molecular characterization and antimicrobial  
273 susceptibility of *Staphylococcus aureus* isolates from clinical infection and asymptomatic  
274 carriers in Southwest Nigeria. *PLoS One* 2015; 10: e0137531.

275 68 Birri DJ, Brede DA, Tessema GT et al. Bacteriocin Production, Antibiotic Susceptibility  
276 and Prevalence of Haemolytic and Gelatinase Activity in Faecal Lactic Acid Bacteria Isolated  
277 from Healthy Ethiopian Infants. *Microb Eco* 2013; 65: 504-516.

278 69 Cholley P, Ka R, Guyeux C et al. Population structure of clinical *Pseudomonas aeruginosa*  
279 from West and Central African countries. *PLoS One* 2014; 9: e107008.

280 70 Conceição T, Coelho C, Santos-Silva I et al. Epidemiology of methicillin-resistant and -  
281 susceptible *Staphylococcus aureus* in Luanda, Angola: first description of the spread of the  
282 MRSA ST5-IVa clone in the African continent. *Microb Drug Resist* 2014; 20: 441-9.

283 71 Egyir B, Guardabassi L, Nielsen SS et al. Prevalence of nasal carriage and diversity of  
284 *Staphylococcus aureus* among inpatients and hospital staff at Korle Bu Teaching Hospital,  
285 Ghana. *J Global Antimicrob Resist* 2013; 1: 189-193.

286 72 Egyir B, Guardabassi L, Sørnum M et al. Molecular epidemiology and antimicrobial  
287 susceptibility of clinical *Staphylococcus aureus* from healthcare institutions in Ghana. *PLoS One*  
288 2014; 9: e89716.

289 73 Ekundayo EO, Ndubuisi RN. In-vitro antimicrobial susceptibility pattern of  
290 *Staphylococcus aureus* isolates in Umuahia, Abia State, Nigeria. *Afr J Clin Exper Micro* 2015; 16:  
291 62-66.

292 74 Ernest AI, Ng'Walida N, Ndaboine E et al. Maternal vaginorectal colonization by *Group B*  
293 *Streptococcus* and *Listeria monocytogenes* and its risk factors among pregnant women  
294 attending tertiary hospital in Mwanza, Tanzania. *Tanzan J Health Res* 2015; 17: 2.

295 75 Eyoh AB, Toukam M, Atashili J et al. Relationship between multiple drug resistance and  
296 biofilm formation in *Staphylococcus aureus* isolated from medical and non-medical personnel  
297 in Yaounde, Cameroon. *Pan Afr Med J* 2014; 17: 186.

298 76 Hamdan HZ, Kubbara E, Adam AM et al. Urinary tract infections and antimicrobial  
299 sensitivity among diabetic patients at Khartoum, Sudan. *Ann Clin Microbiol Antimicrob* 2015;  
300 14: 26.

301 77 Harrois D, Breurec S, Seck A et al. Prevalence and characterization of extended-  
302 spectrum  $\beta$ -lactamase-producing clinical *Salmonella enterica* isolates in Dakar, Senegal, from  
303 1999 to 2009. *Clin Micro Infect* 2014; 20: O109-16.

304 78 Keenan JD, Klugman KP, McGee L et al. Evidence for clonal expansion after antibiotic  
305 selection pressure: Pneumococcal multilocus sequence types before and after mass  
306 azithromycin treatments. *J Infect Dis* 2015; 211: 988-994.

307 79 Lemma MT, Zenebe Y, Tulu B et al. Methicillin resistant *Staphylococcus aureus* among  
308 HIV infected pediatric patients in northwest Ethiopia: Carriage rates and antibiotic co-  
309 resistance profiles. *PLoS One* 2015; 10: e0137254.

310 80 Lerbech AM, Opintan JA, Bekoe SO et al. Antibiotic exposure in a low-income country:  
311 screening urine samples for presence of antibiotics and antibiotic resistance in coagulase  
312 negative staphylococcal contaminants. *PloS One* 2014; 9: e113055.

313 81 Moyo S, Haldorsen B, Aboud S et al. Identification of VIM-2-producing *Pseudomonas*  
314 *aeruginosa* from Tanzania is associated with sequence types 244 and 640 and the location of  
315 blaVIM-2 in a TniC integron. *Antimicrob Agents Chemother* 2015; 59: 682-5.

316 82 Moyo SJ, Aboud S, Blomberg B et al. High nasal carriage of methicillin-resistant  
317 *Staphylococcus aureus* among healthy Tanzanian under-5 children. *Microb Drug Resist* 2014;  
318 20: 82-8.

319 83 Mushi MF, Mshana SE, Imirzalioglu C et al. Carbapenemase genes among multidrug  
320 resistant gram negative clinical isolates from a tertiary hospital in Mwanza, Tanzania. *BioMed*  
321 *Res Int* 2014; 2014: 303104.

322 84 Ndossa A, Okamo B, Mushi MF et al. Factors associated with colonization of  
323 *Streptococcus pneumoniae* among under-fives attending clinic in Mwanza city, Tanzania.  
324 *Tanzan J Health Res* 2015; 17: 1.

325 85 Nelson E, Kayega J, Seni J et al. Evaluation of existence and transmission of extended  
326 spectrum beta lactamase producing bacteria from post-delivery women to neonates at  
327 Bugando Medical Center, Mwanza-Tanzania. *BMC Res Notes* 2014; 7: 279.

328 86 Ntirenganya C, Manzi O, Muvunyi CM et al. High prevalence of antimicrobial resistance  
329 among common bacterial isolates in a tertiary healthcare facility in Rwanda. *Am J Trop Med*  
330 *Hyg* 2015; 92: 865-70.

331 87 Nurjadi D, Olalekan AO, Layer F et al. Emergence of trimethoprim resistance gene *dfpG*  
332 in *Staphylococcus aureus* causing human infection and colonization in sub-Saharan Africa and  
333 its import to Europe. *J Antimicrob Chemother* 2014; 69: 2361-8.

334 88 Nwadike VU, Ojide CK, Kalu EI et al. Multidrug resistant *acinetobacter* infection and their  
335 antimicrobial susceptibility pattern in a Nigerian tertiary hospital ICU. *Afr J Infect Dis* 2014; 8:  
336 14-18.

337 89 Ogbolu DO, Webber MA. High-level and novel mechanisms of carbapenem resistance in  
338 Gram-negative bacteria from tertiary hospitals in Nigeria. *Int J Antimicrob Agents* 2014; 43:  
339 412-7.

340 90 Okoje-Adesomoju VN, Ifesanya JU, Alonge TO. Antimicrobial susceptibility pattern of  
341 oral microbial isolates among pregnant women in Ibadan South-East local government area,  
342 Nigeria. *Afr J Biomed Res* 2015; 18: 29-3.

343 91 Oladeinde BH, Omoregie R, Oladeinde OB. Asymptomatic urinary tract infection among  
344 pregnant women receiving ante-natal care in a traditional birth home in Benin City, Nigeria.  
345 *Ethiop J Health Sci* 2015; 25: 3-8.

346 92 O'Malley SM, Emele FE, Nwaokorie FO et al. Molecular typing of antibiotic-resistant  
347 *Staphylococcus aureus* in Nigeria. *J Infect Pub Health* 2015; 8: 187-93.

348 93 Omuse G, Kabera B, Revathi G. Low prevalence of methicillin resistant *Staphylococcus*  
349 *aureus* as determined by an automated identification system in two private hospitals in  
350 Nairobi, Kenya: a cross sectional study. *BMC Infect Dis* 2014; 14: 669

351 94 Parameswarappa J, Basavaraj VP, Basavaraj CM. Isolation, identification, and  
352 antibiogram of *enterococci* isolated from patients with urinary tract infection. *Ann Afr Med*; 12:  
353 176-81

354 95 Hailemariam M, Abebe T, Mihret A et al. Prevalence of *Neisseria gonorrhoea* and their  
355 antimicrobial susceptibility patterns among symptomatic women attending gynecology  
356 outpatient department in Hawassa referral hospital, Hawassa, Ethiopia. *Ethiop J Health Sci*  
357 2013; 23: 10-18.

358 96 Kouegnigan Rerambiah L, Ndong JC, Medzegue S et al. Genital *Mycoplasma* infections  
359 and their resistance phenotypes in an African setting. *Eur J Clin Microbiol Infect Dis* 2015; 34:  
360 1087-90.

361 97 Vandepitte J, Hughes P, Matovu G et al. High prevalence of ciprofloxacin-resistant  
362 *gonorrhoea* among female sex workers in Kampala, Uganda (2008-2009). *Sex Transm Dis* 2014;  
363 41: 233-7.

364 98 Tsai AY, Dueger E, Macalino GE et al. The U.S. military's *Neisseria gonorrhoeae*  
365 resistance surveillance initiatives in selected populations of five countries. *MSMR* 2013; 20: 25-  
366 7.

367 99 Tibebe M, Shibabaw A, Medhin G et al. *Neisseria gonorrhoeae* non-susceptible to  
368 cephalosporins and quinolones in Northwest Ethiopia. *BMC Infect Dis* 2013; 13: 415.

369 100 Takuva S, Mugurungi O, Mutsvangwa J et al. Etiology and antimicrobial susceptibility of  
370 pathogens responsible for urethral discharge among men in Harare, Zimbabwe. *Sex Transm Dis*  
371 2014; 41: 713-717.

372 101 Odhiambo F, Galgalo T, Wences A et al. Antimicrobial resistance: capacity and practices  
373 among clinical laboratories in Kenya, 2013. *Pan Afr Med J* 2014; 19: 332.

374 102 Tadesse G. A meta-analysis of the proportion of antimicrobial resistant human  
375 *Salmonella* isolates in Ethiopia. *BMC Pharm Tox* 2014; 15: 51.

376 103 Baltazar M, Ngandjio A, Holt KE et al. Multidrug-resistant *Salmonella enterica* serotype  
377 *Typhi*, Gulf of Guinea Region, Africa. *Emerg Infect Dis* 2015; 21:655-9.



378 104 Leopold SJ, van Leth F, Tarekegn H et al. Antimicrobial drug resistance among clinically  
379 relevant bacterial isolates in sub-Saharan Africa: a systematic review. *J Antimicrob Chemother*  
380 2014; 69: 2337-2353.

381 105 Feasey NA, Cain AK, Msefula CL et al. Drug resistance in *Salmonella enterica ser.*  
382 *Typhimurium* bloodstream infection, Malawi. *Emerg Infect Dis* 2014; 20: 1957-9.

383 106 Dia ML, Sonko MA, Kâ R et al. Serotype and antimicrobial susceptibility patterns of  
384 *Streptococcus pneumoniae* isolates in Senegal between 1996 and 2010. *Méd Mal Infect* Jul  
385 2013; 43: 304-5.

386 107 Diene SM, Fall B, Kempf M et al. Emergence of the OXA-23 carbapenemase-encoding  
387 gene in multidrug-resistant *Acinetobacter baumannii* clinical isolates from the Principal  
388 Hospital of Dakar, Senegal. *Int J Infect Dis* 2013; 17: e209-10

389 108 Guedezounme L, Chodaton M, Ahoyo TA et al. Resistance evaluation of *Escherichia coli*  
390 strains isolated from urines in the urban environment in Benin. *Antimicrob Resist Infect*  
391 *Control* 2013; 2: P19.

392 109 Ibrahim ME, Bilal NE, Hamid ME. Comparison of phenotypic characteristics and  
393 antimicrobial resistance patterns of clinical *Escherichia coli* collected from two unrelated  
394 geographical areas. *Glob J Health Sci* 2014; 6: 126-35.

395 110 Odongo CO, Anywar DA, Luryamamoi K et al. Antibigrams from community-acquired  
396 uropathogens in Gulu, northern Uganda--a cross-sectional study. *BMC Infect Dis* 2013; 13: 193.

397 111 Elmadiena MM, El Hussein AA, Muckle CA et al. Antimicrobial susceptibility and multi-  
398 drug resistance of *Salmonella enterica subspecies enterica serovars* in Sudan. *Trop Anim Health*  
399 *Prod* 2013; 45: 1113-8.

400 112 Walters MS, Routh J, Mikoleit M et al. Shifts in Geographic Distribution and  
401 Antimicrobial Resistance during a Prolonged Typhoid Fever Outbreak - Bundibugyo and Kasese  
402 Districts, Uganda, 2009-2011. *PLoS Neg Trop Dis* 2014; 8: e2726.

403 113 Bouba G, Nelly Michèle G, Lombart JP. *Neisseria meningitidis* susceptibility in North-  
404 Cameroon. *Méd Mal Infect* 2014; 44: 443-4.

405 114 Maina D, Omuse G, Revathi G et al. Spectrum of microbial diseases and resistance  
406 patterns at a private teaching hospital in Kenya: Implications for clinical practice. *PLoS One*  
407 2016; 11: e0147659.

408 115 Mkony MF, Mizinduko MM, Massawe A et al. Management of neonatal sepsis at  
409 Muhimbili National Hospital in Dar es Salaam: diagnostic accuracy of C-reactive protein and  
410 newborn scale of sepsis and antimicrobial resistance pattern of etiological bacteria. *BMC*  
411 *Pediatr* 2014; 14: 293.

412 116 Raji MA, Jamal W, Ojemeh O et al. Sequence analysis of genes mediating extended-  
413 spectrum beta-lactamase (ESBL) production in isolates of Enterobacteriaceae in a Lagos  
414 Teaching Hospital, Nigeria. *BMC Infect Dis* 2015; 15: 259.

415 117 Raji MA, Jamal W, Ojemhen O et al. Point-surveillance of antibiotic resistance in  
416 Enterobacteriaceae isolates from patients in a Lagos Teaching Hospital, Nigeria. *J Infect Pub*  
417 *Health* 2013; 6: 431-7.
